# Supplementary material for: Diet at Age 10 and 13 Years in Children Identified as Picky Eaters at Age 3 Years and in Children Who Are Persistent Picky Eaters in A Longitudinal Birth Cohort Study
Source: PubMed Central journal article supplement (PMC6521015; doi:10.3390/nu11040807), 2019-04-10
Supplement: nutrients-11-00807-s001.pdf [file nutrients-11-00807-s001.pdf]

## **Supplementary text S1**

Food groups assessed at 3 years of age by 3-day food record that are not different between the picky eating groups:

High fibre breakfast cereals; other breakfast cereals; yoghurt; puddings and ice cream; buns, cakes, pastries; sugar confectionery; sugar, preserves, sweet spreads; crisps, savoury snacks; bread, all types; fat spreads, all types; potatoes, all types; pasta, rice, pizza; baked beans; eggs, egg dishes; cheese; nuts; milk- and tomato-based sauces; soup; sugar-sweetened dilutable drinks; diet dilutable drinks; tea; coffee

**Supplementary Table S1** Percentage of misreporting of energy intake in participants enrolled in ALSPAC who were classified into cross-sectional picky eating categories at age 3 years and/or into longitudinal picky eating categories at 2–5.5 years of age based on 3-day food records

|                                       | <b>n</b> | <b>Under-reporters<br/>(%)</b> | <b>Plausible reporters<br/>(%)</b> | <b>Over-reporters<br/>(%)</b> |
|---------------------------------------|----------|--------------------------------|------------------------------------|-------------------------------|
| <b>Cross-sectional classification</b> |          |                                |                                    |                               |
| Age 10 years                          |          |                                |                                    |                               |
| Non-picky                             | 2341     | 37.7                           | 59.6                               | 2.7                           |
| Somewhat picky                        | 2169     | 34.7                           | 62.1                               | 3.2                           |
| Very picky                            | 804      | 31.7                           | 64.8                               | 3.5                           |
| Total                                 | 5314     | 35.5                           | 61.4                               | 3.0                           |
| Age 13 years                          |          |                                |                                    |                               |
| Non-picky                             | 1981     | 63.4                           | 35.5                               | 1.1                           |
| Somewhat picky                        | 1820     | 59.4                           | 39.7                               | 0.8                           |
| Very picky                            | 693      | 58.1                           | 39.9                               | 1.9                           |
| Total                                 | 4494     | 61.1                           | 37.9                               | 1.1                           |
| <b>Longitudinal classification</b>    |          |                                |                                    |                               |
| Age 10 years                          |          |                                |                                    |                               |
| Never                                 | 1380     | 37.3                           | 59.5                               | 3.3                           |
| Low                                   | 3159     | 35.6                           | 61.5                               | 2.9                           |
| High                                  |          |                                |                                    |                               |
| Early: Non-persistent                 | 275      | 30.7                           | 65.3                               | 4.0                           |
| Early: Persistent                     | 402      | 32.9                           | 63.8                               | 3.2                           |
| Late                                  | 98       | 31.6                           | 67.3                               | 1.0                           |
| Total                                 | 5314     | 35.5                           | 61.4                               | 3.0                           |
| Age 13 years                          |          |                                |                                    |                               |
| Never                                 | 1152     | 64.6                           | 34.7                               | 0.7                           |
| Low                                   | 2675     | 60.1                           | 38.8                               | 1.1                           |
| High                                  |          |                                |                                    |                               |
| Early: Non-persistent                 | 239      | 56.2                           | 41.7                               | 2.1                           |
| Early: Persistent                     | 344      | 60.6                           | 37.4                               | 2.1                           |
| Late                                  | 84       | 53.6                           | 45.2                               | 1.2                           |
| Total                                 | 4494     | 61.0                           | 37.9                               | 1.1                           |

For details of misreporting classification see Methods in main text.

**Supplementary Table S2** Nutrients intake from 3-day food records at age 10 and 13 years in children with plausible energy intakes enrolled in ALSPAC who were classified in to picky eating categories at age 3 years (cross-sectional)

| Nutrient                         | Age 10 years       |                      |                      | Age 13 years       |                      |                    |
|----------------------------------|--------------------|----------------------|----------------------|--------------------|----------------------|--------------------|
|                                  | Non-picky eater    | Somewhat picky eater | Very picky eater     | Non-picky eater    | Somewhat picky eater | Very picky eater   |
| n                                | 1386               | 1340                 | 520                  | 696                | 717                  | 272                |
| Macronutrients                   |                    |                      |                      |                    |                      |                    |
| Energy (MJ)                      | 8.50 (8.44, 8.57)  | 8.34 (8.28, 8.40)**  | 8.28 (8.18, 8.38)**  | 9.98 (9.86, 10.10) | 9.81 (9.70, 9.93)    | 9.95 (9.76, 10.13) |
| Protein (g/day)                  | 67.0 (66.3, 67.8)  | 64.9 (64.1, 65.6)*** | 63.2 (62.1, 64.4)*** | 81.1 (79.7, 82.5)  | 79.0 (77.6, 80.3)    | 78.4 (75.9, 80.8)  |
| Free sugar (% energy)            | 17.8 (17.6, 18.1)  | 18.5 (18.2, 18.8)**  | 18.5 (18.0, 19.0)    | 17.6 (17.1, 18.)   | 18.3 (17.9, 18.7)    | 18.7 (17.9, 19.6)* |
| Dietary fibre (g/day)            | 12.4 (12.2, 12.6)  | 12.1 (11.9, 12.3)    | 11.5 (11.2, 11.8)*** | 14.9 (14.5, 15.2)  | 14.7 (14.3, 15.0)    | 14.1 (13.5, 14.7)  |
| Micronutrients                   |                    |                      |                      |                    |                      |                    |
| Vitamin A                        |                    |                      |                      |                    |                      |                    |
| Carotene (µg/day)                | 2209 (2123, 2294)  | 2189 (2096, 2281)    | 1940 (1790, 2089)**  | 2649 (2490, 2808)  | 2542 (2384, 2701)    | 2543 (2324, 2762)  |
| Vitamin B <sub>12</sub> (µg/day) | 3.77 (3.66, 3.87)  | 3.66 (3.56, 3.75)    | 3.60 (3.41, 3.79)    | 5.14 (4.95, 5.32)  | 4.86 (4.69, 5.03)    | 4.84 (4.56, 5.12)  |
| Vitamin D (µg/day)               | 2.85 (2.78, 2.92)  | 2.82 (2.74, 2.90)    | 2.63 (2.53, 2.74)**  | 3.25 (3.12, 3.39)  | 3.08 (2.97, 3.20)    | 3.11 (2.93, 3.29)  |
| Vitamin E (mg/day)               | 9.96 (9.77, 10.15) | 9.75 (9.56, 9.94)    | 9.37 (9.04, 9.70)**  | 11.2 (10.8, 11.5)  | 10.6 (10.3, 10.9)*   | 10.7 (10.2, 11.3)  |
| Zinc (mg/day)                    | 7.4 (7.2, 7.5)     | 7.1 (7.0, 7.2)**     | 6.8 (6.7, 7.0)***    | 8.9 (8.7, 9.1)     | 8.7 (8.5, 8.9)       | 8.4 (8.1, 8.7)*    |
| Iron (mg/day)                    | 9.6 (9.5, 9.8)     | 9.6 (9.5, 9.7)       | 9.4 (9.2, 9.6)       | 11.8 (11.5, 12.0)  | 11.7 (11.4, 11.9)    | 11.5 (11.1, 11.9)  |
| Selenium (µg/day)                | 62.0 (61.0, 63.0)  | 60.9 (59.8, 61.9)    | 59.2 (57.5, 60.9)*   | 72.8 (70.3, 75.3)  | 71.2 (69.4, 73.0)    | 70.9 (67.2, 74.6)  |

Values are mean (95% confidence interval).

Value at same age significantly different from that of children who were non-picky eaters: \* $p \leq 0.05$ , \*\* $p \leq 0.01$ , \*\*\* $p \leq 0.001$ .

Additional nutrients for which there were no significant differences at both 10 and 13 years (data not shown): carbohydrate, fat, retinol, retinol equivalents, thiamin, riboflavin, niacin, vitamin B<sub>6</sub>, folate, vitamin C, calcium, iodine.

See Supplementary Table 1 for details of classification of plausible energy intakes.

**Supplementary Table S3** Food and food group intakes (g/day) at age 10 and 13 years in children with plausible energy intakes enrolled in ALSPAC who were classified in to picky eating categories at age 3 years (cross-sectional) from 3-day food records

|                             | Age 10 years    |                      |                 | Age 13 years    |                      |                |
|-----------------------------|-----------------|----------------------|-----------------|-----------------|----------------------|----------------|
|                             | Non-picky eater | Somewhat picky eater | Picky eater     | Non-picky eater | Somewhat picky eater | Picky eater    |
| n                           | 1386            | 1340                 | 520             | 696             | 717                  | 272            |
| Total meat                  | 112 (109, 115)  | 100 (97, 103)***     | 95 (90, 100)*** | 139 (132, 145)  | 131 (124, 137)       | 130 (119, 141) |
| Meat, carcass <sup>1</sup>  | 63 (60, 66)     | 56 (53, 59)**        | 47 (43, 51)***  | 82 (76, 87)     | 79 (74, 85)          | 80 (70, 90)    |
| Processed meat <sup>2</sup> | 49 (47, 51)     | 44 (42, 46)*         | 48 (44, 52)     | 57 (53, 55)     | 51 (47, 57)          | 50 (43, 56)    |
| Total fish                  | 14 (13, 15)     | 15 (14, 16)          | 12 (10, 14)     | 17 (15, 20)     | 16 (14, 19)          | 14 (10, 18)    |
| Total vegetables            | 76 (73, 80)     | 69 (66, 72)**        | 53 (49, 57)***  | 98 (93, 104)    | 90 (84, 95)          | 76 (68, 85)*** |
| Total fruit                 | 76 (72, 80)     | 74 (70, 78)          | 70 (63, 77)     | 94 (86, 103)    | 95 (88, 103)         | 81 (70, 93)    |
| Total milk <sup>3</sup>     | 241 (231, 251)  | 231 (221, 241)       | 250 (232, 268)  | 275 (255, 294)  | 249 (233, 265)       | 263 (234, 293) |
| Total sweet foods           | 143 (140, 147)  | 144 (141, 148)       | 135 (130, 141)  | 149 (142, 155)  | 146 (140, 151)       | 153 (143, 163) |
| Chocolate confectionery     | 20 (19, 21)     | 22 (21, 23)          | 23 (21, 25)*    | 21 (19, 23)     | 23 (21, 25)          | 23 (20, 26)    |
| Buns, cakes, and pastries   | 32 (30, 34)     | 32 (31, 34)          | 29 (27, 32)     | 41 (38, 45)     | 40 (37, 43)          | 41 (35, 47)    |
| Sweet biscuits and cookies  | 22 (21, 23)     | 21 (20, 22)          | 22(20, 23)*     | 26(24, 29)      | 25 (23, 27)          | 23 (20, 26)    |
| Soft drinks with sugar      | 117 (108, 126)  | 109 (100, 118)       | 111 (97, 124)   | 164 (146, 182)  | 157 (138, 176)       | 171 (138, 204) |
| Fruit juice                 | 124 (116, 132)  | 139 (130, 148)*      | 129 (125, 137)  | 183 (166, 199)  | 209 (192, 226)       | 219 (192, 245) |
| Savoury sauces <sup>4</sup> | 16 (15, 17)     | 14 (13, 15)**        | 12 (11, 14)***  | 20 (18, 22)     | 17 (15, 19)*         | 17 (14, 19)    |

Values are mean (95% confidence interval).

Value at same age significantly different from that of children who were not picky eaters: \* $p \leq 0.05$ , \*\* $p \leq 0.01$ , \*\*\* $p \leq 0.001$ .

<sup>1</sup>Foods included carcass meat from lamb, pork, beef, poultry, liver and kidney.

<sup>2</sup>Foods included sausages, ham, bacon, burgers, meat pies, breaded poultry, salami, etc.

<sup>3</sup>Milks included whole, semi-skimmed, skimmed cows' milk, other animal milks, soya milk and cream.

<sup>4</sup>Savoury sauces included gravy, salad dressing, barbecue sauce, etc.

See Supplementary Table 1 for details of classification of plausible energy intakes.

**Supplementary Table S4** Nutrient intakes from 3-day food records at age 10 and 13 years in children enrolled in ALSPAC with plausible energy intakes who were classified into longitudinal picky eating (PE) categories between 2 and 5.5 years of age

| Nutrient                               | Never PE                        | Low PE                          | High PE                         |                                 |                                  |
|----------------------------------------|---------------------------------|---------------------------------|---------------------------------|---------------------------------|----------------------------------|
|                                        |                                 |                                 | Early PE                        |                                 | Late PE                          |
|                                        |                                 |                                 | Non-persistent PE               | Persistent PE                   |                                  |
| <b>Age 10 years</b>                    |                                 |                                 |                                 |                                 |                                  |
| n                                      | 814                             | 1931                            | 179                             | 256                             | 66                               |
| <b>Macronutrients</b>                  |                                 |                                 |                                 |                                 |                                  |
| Energy (MJ/day)                        | 8.58 (8.50, 8.67) <sup>a</sup>  | 8.35 (8.30, 8.41) <sup>b</sup>  | 8.37 (8.19, 8.54) <sup>ab</sup> | 8.24 (8.10, 8.39) <sup>b</sup>  | 8.14 (7.84, 8.43) <sup>b</sup>   |
| Protein (g/day)                        | 67.9 (66.9, 68.8) <sup>a</sup>  | 65.2 (64.6, 65.9) <sup>b</sup>  | 64.0 (62.0, 66.0) <sup>bc</sup> | 62.0 (60.3, 63.8) <sup>c</sup>  | 62.6 (59.3, 66.0) <sup>bc</sup>  |
| Fat (g/day)                            | 84.0 (82.8, 85.3) <sup>a</sup>  | 80.9 (80.2, 81.6) <sup>b</sup>  | 81.4 (79.0, 83.9) <sup>ab</sup> | 79.6 (77.4, 81.8) <sup>b</sup>  | 77.4 (77.4, 81.9) <sup>b</sup>   |
| Free sugar (% energy)                  | 17.7 (17.3, 18.1) <sup>a</sup>  | 18.3 (18.1, 18.6) <sup>b</sup>  | 18.3 (17.4, 19.1) <sup>ab</sup> | 18.7 (18.0, 19.4) <sup>ab</sup> | 19.5 (18.0, 20.9) <sup>ab</sup>  |
| Dietary fibre (g NSP/day)              | 12.6 (12.4, 12.8) <sup>a</sup>  | 12.2 (12.0, 12.3) <sup>b</sup>  | 11.6 (11.1, 12.1) <sup>bc</sup> | 11.1 (10.7, 11.5) <sup>c</sup>  | 11.4 (10.6, 12.1) <sup>bc</sup>  |
| <b>Micronutrients</b>                  |                                 |                                 |                                 |                                 |                                  |
| <b>Vitamin A</b>                       |                                 |                                 |                                 |                                 |                                  |
| Carotene (µg/day)                      | 2301 (2186, 2417) <sup>a</sup>  | 2170 (2094, 2245) <sup>a</sup>  | 2121 (1890, 2312) <sup>ab</sup> | 1694 (1472, 1917) <sup>b</sup>  | 1913 (1542, 2284) <sup>ab</sup>  |
| Retinol equivalents (µg RE/day)        | 782 (752, 812) <sup>a</sup>     | 745 (722, 768) <sup>a</sup>     | 818 (704, 932) <sup>a</sup>     | 637 (595, 679) <sup>b</sup>     | 764 (534, 994) <sup>ab</sup>     |
| <b>Niacin (mg NEq/day)</b>             | 31.7 (31.2, 32.2) <sup>a</sup>  | 30.9 (30.6, 31.2) <sup>ab</sup> | 30.6 (29.6, 31.7) <sup>ab</sup> | 29.9 (29.0, 30.8) <sup>b</sup>  | 29.7 (27.9, 31.5) <sup>ab</sup>  |
| <b>Vitamin B<sub>6</sub> (mg/day)</b>  | 2.0 (2.0, 2.1)                  | 2.0 (1.9, 2.0)                  | 2.0 (1.9, 2.1)                  | 1.9 (1.8, 1.9)                  | 1.9 (1.7, 2.0)                   |
| <b>Vitamin B<sub>12</sub> (µg/day)</b> | 3.7 (3.6, 3.9)                  | 3.7 (3.6, 3.8)                  | 3.7 (3.3, 4.2)                  | 3.4 (3.2, 3.6)                  | 3.8 (3.1, 4.5)                   |
| <b>Folate (µg/day)</b>                 | 226.0 (221.4, 230.6)            | 221.8 (218.7, 224.9)            | 225.6 (215.3, 235.8)            | 215.2 (206.2, 224.2)            | 201.7 (185.8, 217.7)             |
| <b>Vitamin D (µg/day)</b>              | 2.9 (2.8, 3.0)                  | 2.8 (2.8, 2.9)                  | 2.6 (2.6, 2.8)                  | 2.6 (2.5, 2.8)                  | 2.5 (2.2, 2.8)                   |
| <b>Vitamin E (mg/day)</b>              | 10.0 (9.8, 10.3)                | 9.8 (9.6, 9.9)                  | 9.4 (8.9, 9.9)                  | 9.4 (8.9, 9.9)                  | 9.0 (8.2, 9.9)                   |
| <b>Iron (mg/day)</b>                   | 9.7 (9.6, 9.8) <sup>a</sup>     | 9.6 (9.5, 9.7) <sup>ab</sup>    | 9.4 (9.1, 9.8) <sup>ab</sup>    | 9.2 (9.0, 9.5) <sup>b</sup>     | 9.3 (8.7, 10.0) <sup>ab</sup>    |
| <b>Zinc (mg/day)</b>                   | 7.4 (7.3, 7.6) <sup>a</sup>     | 7.2 (7.1, 7.2) <sup>b</sup>     | 6.9 (6.6, 7.1) <sup>bc</sup>    | 6.7 (6.4, 7.0) <sup>c</sup>     | 6.9 (6.3, 7.4) <sup>abc</sup>    |
| <b>Selenium (µg/day)</b>               | 62.6 (61.3, 63.8) <sup>a</sup>  | 61.1 (60.3, 62.0) <sup>ab</sup> | 58.5 (55.6, 61.4) <sup>ab</sup> | 58.4 (56.3, 60.7) <sup>b</sup>  | 57.3 (52.6, 61.9) <sup>ab</sup>  |
| <b>Age 13 years</b>                    |                                 |                                 |                                 |                                 |                                  |
| n                                      | 394                             | 1028                            | 98                              | 127                             | 38                               |
| <b>Macronutrients</b>                  |                                 |                                 |                                 |                                 |                                  |
| Energy (kJ/day)                        | 10.06 (9.90, 10.23)             | 9.84 (9.74, 9.93)               | 10.05 (9.70, 10.41)             | 9.86 (9.62, 10.09)              | 9.93 (9.36, 10.50)               |
| Protein (g/day)                        | 81.9 (80.0, 83.9)               | 79.5 (78.4, 80.6)               | 79.4 (74.9, 83.8)               | 77.0 (73.7, 80.4)               | 74.1 (68.0, 80.3)                |
| Fat (g/day)                            | 98.6 (96.5, 100.6) <sup>a</sup> | 93.7 (92.5, 95.0) <sup>b</sup>  | 96.0 (92.1, 99.9) <sup>ab</sup> | 94.7 (91.3, 98.0) <sup>ab</sup> | 92.2 (84.3, 100.0) <sup>ab</sup> |
| Free sugar (% energy)                  | 17.1 (16.5, 17.7) <sup>a</sup>  | 18.2 (17.8, 18.6) <sup>b</sup>  | 18.6 (17.1, 20.1) <sup>ab</sup> | 18.7 (17.5, 19.8) <sup>ab</sup> | 20.6 (18.6, 22.6) <sup>b</sup>   |
| Dietary fibre (g NSP/day)              | 15.0 (14.5, 15.4) <sup>a</sup>  | 14.7 (14.4, 15.0) <sup>a</sup>  | 14.6 (13.7, 15.5) <sup>ab</sup> | 13.4 (12.6, 14.2) <sup>b</sup>  | 15.1 (13.4, 16.8) <sup>ab</sup>  |
| <b>Micronutrients</b>                  |                                 |                                 |                                 |                                 |                                  |
| <b>Vitamin A</b>                       |                                 |                                 |                                 |                                 |                                  |
| Carotene (µg/day)                      | 2736 (2516, 2957)               | 2568 (2439, 2698)               | 2649 (2291, 3008)               | 2297 (1980, 2615)               | 2333 (1606, 3061)                |
| Retinol equivalents (µg RE/day)        | 923 (870, 975)                  | 845 (812, 877)                  | 869 (759, 980)                  | 826 (732, 920)                  | 773 (642, 905)                   |
| <b>Niacin (mg NEq/day)</b>             | 37.2 (36.2, 38.1)               | 37.0 (36.4, 37.6)               | 36.2 (34.3, 38.1)               | 35.8 (34.0, 37.6)               | 37.2 (33.9, 40.6)                |
| <b>Vitamin B<sub>6</sub> (mg/day)</b>  | 2.3 (2.3, 2.4)                  | 2.3 (2.3, 2.3)                  | 2.2 (2.1, 2.4)                  | 2.2 (2.1, 2.3)                  | 2.3 (2.1, 2.6)                   |
| <b>Vitamin B<sub>12</sub> (µg/day)</b> | 5.2 (4.9, 5.4)                  | 4.9 (4.8, 5.1)                  | 4.4 (4.0, 4.8)                  | 5.1 (4.6, 5.6)                  | 4.3 (3.5, 5.0)                   |
| <b>Folate (µg/day)</b>                 | 266.5 (257.6, 275.4)            | 267.6 (261.9, 273.2)            | 260.0 (242.6, 277.4)            | 268.5 (252.4, 284.6)            | 252.2 (225.9, 278.5)             |
| <b>Vitamin D (µg/day)</b>              | 3.3 (3.1, 3.4)                  | 3.1 (3.0, 3.2)                  | 3.1 (2.8, 3.4)                  | 3.1 (2.8, 3.3)                  | 2.9 (2.4, 3.7)                   |
| <b>Vitamin E (mg/day)</b>              | 11.5 (11.1, 11.9) <sup>a</sup>  | 10.6 (10.4, 10.9) <sup>b</sup>  | 11.1 (10.2, 12.0) <sup>ab</sup> | 10.6 (9.9, 11.3) <sup>ab</sup>  | 10.8 (9.2, 12.3) <sup>ab</sup>   |
| <b>Iron (mg/day)</b>                   | 11.8 (11.5, 12.1)               | 11.7 (11.5, 11.9)               | 11.7 (11.1, 12.3)               | 11.2 (10.7, 11.8)               | 11.5 (10.6, 12.5)                |
| <b>Zinc (mg/day)</b>                   | 9.0 (8.7, 9.2)                  | 8.7 (8.6, 8.9)                  | 8.4 (8.0, 8.8)                  | 8.3 (7.9, 8.7)                  | 8.0 (7.3, 8.7)                   |
| <b>Selenium (µg/day)</b>               | 73.1 (69.5, 76.7)               | 71.2 (69.6, 72.8)               | 76.3 (68.3, 84.3)               | 68.1 (63.6, 72.5)               | 75.8 (65.0, 86.6)                |

NSP, non-starch polysaccharide.

Data at age 7 years are shown in Taylor et al. (2016).

Values are mean (95% confidence interval).

<sup>a,b,c</sup>Values in the same row with unlike superscript letters are significantly different for each age point (p<0.05).

Additional nutrients for which there were no significant differences at both 10 and 13 years (data not shown):

energy for girls, carbohydrate, retinol, thiamin, riboflavin, vitamin C, calcium, iodine.

See Supplementary Table 1 for details of classification of plausible energy intakes.

**Supplementary Table S5** Food and food group intakes (g/day) from 3-day food records at age 10 and 13 years in children enrolled in ALSPAC with plausible energy intakes who were classified into longitudinal picky eating categories between 2 and 5.5 years of age

| Food/food group             | Never PE                    | Low PE                      | High PE                      |                              |                               |
|-----------------------------|-----------------------------|-----------------------------|------------------------------|------------------------------|-------------------------------|
|                             |                             |                             | Early PE                     |                              | Late PE                       |
|                             |                             |                             | Non-persistent PE            | Persistent PE                |                               |
| <b>Age 10 years</b>         |                             |                             |                              |                              |                               |
| n                           | 814                         | 1931                        | 179                          | 256                          | 66                            |
| Total meat                  | 114 (110, 119) <sup>a</sup> | 103 (101, 106) <sup>b</sup> | 99 (90, 108) <sup>bc</sup>   | 89 (81, 97) <sup>c</sup>     | 94 (82, 107) <sup>abc</sup>   |
| Meat, carcass <sup>1</sup>  | 65 (61, 68) <sup>a</sup>    | 58 (55, 60) <sup>b</sup>    | 52 (44, 59) <sup>b</sup>     | 43 (36, 49) <sup>b</sup>     | 44 (32, 56) <sup>b</sup>      |
| Processed meat <sup>2</sup> | 50 (47, 53)                 | 46 (44, 48)                 | 47 (41, 53)                  | 46 (40, 52)                  | 50 (42, 59)                   |
| Eggs and egg dishes         | 10 (9, 11)                  | 10 (9, 11)                  | 8 (5, 10)                    | 7 (5, 9)                     | 4 (2, 7)                      |
| Potatoes, plain or mashed   | 40 (37, 43)                 | 35 (33, 37)                 | 37 (30, 44)                  | 22 (18, 27)                  | 26 (15, 37)                   |
| Total vegetables            | 80 (76, 84) <sup>a</sup>    | 71 (68, 73) <sup>b</sup>    | 62 (54, 69) <sup>b</sup>     | 42 (36, 47) <sup>c</sup>     | 48 (37, 59) <sup>bc</sup>     |
| Total fruit                 | 78 (72, 83)                 | 74 (71, 77)                 | 75 (63, 88)                  | 69 (59, 79)                  | 58 (42, 74)                   |
| Total milk <sup>3</sup>     | 238 (226, 252)              | 235 (226, 243)              | 232 (206, 258)               | 265 (235, 295)               | 245 (192, 299)                |
| Total sweet foods           | 146 (141, 151)              | 142 (139, 145)              | 138 (127, 149)               | 136 (128, 143)               | 151 (131, 171)                |
| Buns, cakes and pastries    | 32 (30, 35)                 | 32 (31, 34)                 | 31 (26, 35)                  | 30 (25, 34)                  | 31 (24, 38)                   |
| Fruit juice                 | 119 (108, 130)              | 136 (129, 144)              | 134 (110, 158)               | 126 (105, 147)               | 130 (90, 170)                 |
| Sweet biscuits and cookies  | 22 (20, 23)                 | 21 (20, 22)                 | 22 (19, 26)                  | 23 (20, 26)                  | 22 (17, 27)                   |
| Chocolate confectionery     | 20 (19, 22)                 | 21 (20, 22)                 | 23 (19, 26)                  | 24 (21, 26)                  | 20 (15, 25)                   |
| Soft drinks with sugar      | 113 (101, 124)              | 114 (106, 121)              | 117 (92, 142)                | 106 (86, 126)                | 88 (58, 118)                  |
| Savoury sauces <sup>5</sup> | 17 (16, 18) <sup>a</sup>    | 15 (14, 15) <sup>b</sup>    | 13 (10, 16) <sup>abc</sup>   | 10 (8, 11) <sup>c</sup>      | 12 (8, 16) <sup>abc</sup>     |
| <b>Age 13 years</b>         |                             |                             |                              |                              |                               |
| n                           | 394                         | 1028                        | 98                           | 127                          | 38                            |
| Total meat                  | 138 (130, 147)              | 135 (130, 140)              | 135 (119, 150)               | 117 (99, 136)                | 108 (80, 133)                 |
| Meat, carcass <sup>1</sup>  | 84 (77, 91)                 | 80 (76, 85)                 | 84 (69, 100)                 | 75 (59, 90)                  | 59 (39, 79)                   |
| Processed meat <sup>2</sup> | 54 (49, 59)                 | 55 (51, 58)                 | 50 (38, 63)                  | 43 (34, 51)                  | 48 (33, 63)                   |
| Eggs and egg dishes         | 12 (10, 15)                 | 11 (10, 13)                 | 9 (4, 13)                    | 8 (4, 11)                    | 7 (2, 13)                     |
| Potatoes, plain or mashed   | 49 (43, 56) <sup>a</sup>    | 40 (37, 43) <sup>ab</sup>   | 37 (26, 48) <sup>ab</sup>    | 30 (22, 38) <sup>b</sup>     | 32 (17, 48) <sup>ab</sup>     |
| Total vegetables            | 106 (98, 114) <sup>a</sup>  | 91 (86, 96) <sup>b</sup>    | 86 (72, 100) <sup>ab c</sup> | 61 (51, 72) <sup>c</sup>     | 62 (42, 83) <sup>bc</sup>     |
| Total fruit                 | 97 (86, 108) <sup>a</sup>   | 95 (88, 101) <sup>a</sup>   | 105 (83, 127) <sup>ac</sup>  | 64 (49, 79) <sup>b</sup>     | 64 (41, 87) <sup>abc</sup>    |
| Total milk <sup>3</sup>     | 280 (253, 308) <sup>a</sup> | 257 (23, 271) <sup>a</sup>  | 184 (151, 216) <sup>b</sup>  | 313 (262, 365) <sup>ac</sup> | 227 (167, 187) <sup>abc</sup> |
| Total sweet foods           | 152 (144, 161)              | 146 (141, 151)              | 157 (140, 173)               | 143 (129, 157)               | 160 (131, 189)                |
| Buns, cakes and pastries    | 44 (39, 48)                 | 40 (37, 42)                 | 47 (36, 59)                  | 34 (27, 41)                  | 39 (25, 52)                   |
| Fruit juice                 | 180 (158, 202)              | 204 (190, 218)              | 235 (183, 287)               | 203 (169, 238)               | 198 (122, 273)                |
| Sweet biscuits and cookies  | 27 (24, 31)                 | 24 (23, 26)                 | 24 (19, 28)                  | 26 (22, 33)                  | 34 (20, 48)                   |
| Chocolate confectionery     | 20 (18, 23)                 | 22 (21, 24)                 | 22 (17, 27)                  | 27 (22, 32)                  | 23 (13, 32)                   |
| Soft drinks with sugar      | 153 (131, 175)              | 164 (148, 180)              | 148 (102, 194)               | 184 (127, 241)               | 180 (102, 257)                |
| Savoury sauces <sup>4</sup> | 20 (17, 22) <sup>a</sup>    | 18 (17, 20) <sup>ab</sup>   | 21 (15, 26) <sup>ab</sup>    | 12 (9, 15) <sup>b</sup>      | 17 (10, 24) <sup>ab</sup>     |

Values are mean (95% confidence interval).

<sup>a,b,c</sup>Values in the same row with unlike superscript letters are significantly different for each age point ( $p < 0.05$ ).

<sup>1</sup>Foods included carcass meat from lamb, pork, beef, poultry, liver and kidney.

<sup>2</sup>Foods included sausages, ham, bacon, burgers, meat pies, breaded poultry, salami, etc.

<sup>3</sup>Milks included whole, semi-skimmed, skimmed cows' milk, other animal milks, soya milk and cream.

<sup>4</sup>Savoury sauces included gravy, salad dressing, barbecue sauce, etc.

See Supplementary Table 1 for details of classification of plausible energy intakes.
